# Supplementary material for: Laparoscopic sacrohysteropexy versus vaginal hysterectomy and apical suspension: 7-year follow-up of a randomized controlled trial
Source: Springer Nature journal article supplement (doi:10.1007/s00192-021-04932-6), 2021-08-23
Supplement: MOESM1 [file 19591000]

**South Central - Oxford C Research Ethics Committee**

Level 3, Block B  
Whitefriars Building  
Lewins Mead  
Bristol  
BS1 2NT  
Tel: 020 7104 8049

**Please note: This is the favourable opinion of the REC only and does not allow the amendment to be implemented at NHS sites in England until the outcome of the HRA assessment has been confirmed.**

08 January 2019

Mr Simon Robert Jackson  
Consultant Gynaecologist  
Oxford Radcliffe Hospitals Trust  
Women's Centre, John Radcliffe Hosp  
Headley Way, Headington, Oxford  
OX3 9DU

Dear Mr Jackson

**Study title:** Laparoscopic hysteropexy versus vaginal hysterectomy for treatment of uterovaginal prolapse: a prospective randomised study.

**REC reference:** 09/H0606/28

**EudraCT number:** N/A

**Amendment number:** 1

**Amendment date:** 18 December 2018

**IRAS project ID:** 11721

The Committee considered an amendment to include a longer term six year follow up. The study will therefore be extended until 01/09/2019 to allow for all study participants to attend for follow up.

The above amendment was reviewed by the Sub-Committee in correspondence.

**Ethical opinion**

The members of the Committee taking part in the review gave a favourable ethical opinion of the amendment on the basis described in the notice of amendment form and supporting documentation.

## Approved documents

The documents reviewed and approved at the meeting were:

| <i>Document</i>                                                                   | <i>Version</i> | <i>Date</i>       |
|-----------------------------------------------------------------------------------|----------------|-------------------|
| Covering letter on headed paper [REC Cover Letter 14.9 MI]                        |                | 18 December 2018  |
| Letters of invitation to participant [Cover Letter 17.9.2018]                     | 1              | 17 September 2018 |
| Notice of Substantial Amendment (non-CTIMP)<br>[AmendmentForm_ReadyForSubmission] | 1              | 18 December 2018  |
| Participant information sheet (PIS) [PIS 15.11]                                   | 1              | 14 September 2018 |
| Research protocol or project proposal [28.11.2018 V2 VHvLSH]                      | 2              | 14 September 2018 |
| Validated questionnaire [Gen PISQ12]                                              |                |                   |
| Validated questionnaire [ICIQ-FLUTS]                                              |                |                   |
| Validated questionnaire [ICIQ-VS]                                                 |                |                   |
| Validated questionnaire [PGI-I]                                                   |                |                   |

## Membership of the Committee

The members of the Committee who took part in the review are listed on the attached sheet.

## Working with NHS Care Organisations

Sponsors should ensure that they notify the R&D office for the relevant NHS care organisation of this amendment in line with the terms detailed in the categorisation email issued by the lead nation for the study.

## Statement of compliance

The Committee is constituted in accordance with the Governance Arrangements for Research Ethics Committees and complies fully with the Standard Operating Procedures for Research Ethics Committees in the UK.

We are pleased to welcome researchers and R & D staff at our Research Ethics Committee members' training days – see details at <http://www.hra.nhs.uk/hra-training/>

|                     |                                                       |
|---------------------|-------------------------------------------------------|
| <b>09/H0606/28:</b> | <b>Please quote this number on all correspondence</b> |
|---------------------|-------------------------------------------------------|

Yours sincerely  
PP

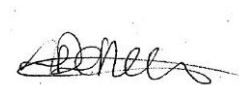

**Mr David Carpenter**  
**Chair**

E-mail: nrescommittee.southcentral-oxfordc@nhs.net

*Enclosures:*                      *List of names and professions of members who took part in the review*

*Copy to:*

**South Central - Oxford C Research Ethics Committee**

**Attendance at Sub-Committee of the REC meeting in correspondence.**

**Committee Members:**

| <i>Name</i>        | <i>Profession</i>        | <i>Present</i> | <i>Notes</i>  |
|--------------------|--------------------------|----------------|---------------|
| Mr David Carpenter | Retired Social Scientist | Yes            | Meeting Chair |
| Mrs Rebekah Howe   | Farmer                   | Yes            |               |

**Also in attendance:**

| <i>Name</i>           | <i>Position (or reason for attending)</i> |
|-----------------------|-------------------------------------------|
| Miss Alison Doherty   | REC Assistant                             |
| Miss Charlotte Ferris | REC Manager                               |
